# Supplementary material for: Expression analysis of four pseudo-response regulator (PRR) genes in Chrysanthemum morifolium under different photoperiods
Source: PeerJ journal article supplement (doi:10.7717/peerj.6420), 2019-02-19

M

*CmPRR2*

*CmPRR7*

*CmPRR37*

*CmPRR73*

NC

2000bp

1000bp

750bp

500bp

250bp

100bp

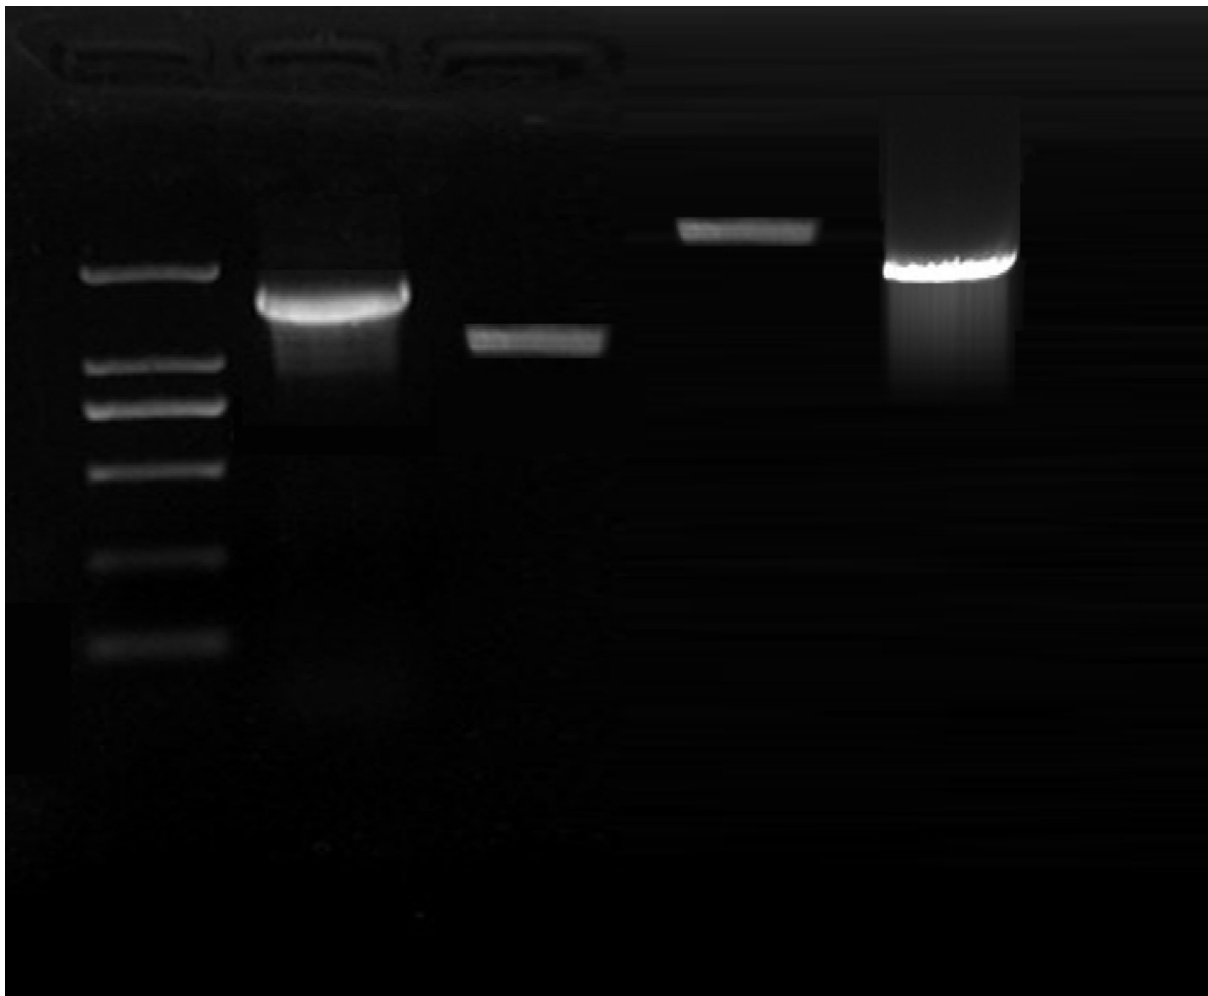

Supplement: Figure_S1.pdf [file Figure_S1.pdf]
